# Supplementary material
Source: Springer Nature journal article supplement (https://www.springermedizin.de/resource/supplementary/13014_2008_103_MOESM2_ESM.pdf/9632914)
Supplement: MOESM2 [file 9632914]

# RiSK

## RADIOTHERAPIE – BASISDOKUMENTATION

Primärtherapie:  Rezidivtherapie :

Name, Vorname : .....

Geburtsdatum: \_\_\_\_ . \_\_\_\_ . \_\_\_\_ Geschlecht :  männlich  weiblich

Straße:.....; PLZ, Wohnort:.....

Diagnose : .....

Therapiestudie / Behandlungsprotokoll : .....

Behandelnde Kinderonkologie (Anschrift/Tel.) :.....

.....  
.....  
.....

Behandelnde Radioonkologie (Anschrift/Tel.,ggf. Stempel) : .....

.....  
.....  
.....

Tumorsitz : .....

Zielgebiet der Bestrahlung: .....

(siehe Liste Seite 5)

Präradiotherapeutische Funktionseinschränkung im Bestrahlungsgebiet :  nein

ja, welche.....

.....

Präradiotherapeutische Funktionseinschränkung außerhalb des Bestrahlungsgebietes :  nein

ja, welche:.....

.....

Körperhöhe vor Radiatio-Beginn in cm: \_\_\_\_\_ Sitzhöhe in cm (bei kraniospinaler  
Bestrahlung): \_\_\_\_\_

Körpergewicht vor Radiatio in kg: \_\_\_\_\_

Bögen zurücksenden an: RiSK-Studienzentrale, Klinik für Strahlentherapie – Radioonkologie -,  
Universitätsklinikum Münster, Albert-Schweitzer-Str. 33, 48129 Münster, Tel: +49-251/83-47387, Fax: +49-  
251-83-47355, Email: radtox@uni-muenster.de

**Bestrahlungsplanung (bei 2 Tumorlokalisationen bitte eine 2. Tabelle verwenden)**

|                               | <b>Zielvolumen I</b>                                                                                             | <b>Zielvolumen II<br/>(Feldeinschränkung,<br/>Boost)</b>                                                         | <b>Zielvolumen III<br/>(Feldeinschränkung,<br/>Boost)</b>                                                        |
|-------------------------------|------------------------------------------------------------------------------------------------------------------|------------------------------------------------------------------------------------------------------------------|------------------------------------------------------------------------------------------------------------------|
| Bestrahlter Organbereich:     |                                                                                                                  |                                                                                                                  |                                                                                                                  |
|                               | <input type="checkbox"/> Stehfeld<br><input type="checkbox"/> Gegenfelder<br><input type="checkbox"/> > 2 Felder | <input type="checkbox"/> Stehfeld<br><input type="checkbox"/> Gegenfelder<br><input type="checkbox"/> > 2 Felder | <input type="checkbox"/> Stehfeld<br><input type="checkbox"/> Gegenfelder<br><input type="checkbox"/> > 2 Felder |
| Zahl der Bestrahlungsfelder : |                                                                                                                  |                                                                                                                  |                                                                                                                  |
| Nonkoplanare Felder :         | <input type="checkbox"/> ja <input type="checkbox"/> nein                                                        | <input type="checkbox"/> ja <input type="checkbox"/> nein                                                        | <input type="checkbox"/> ja <input type="checkbox"/> nein                                                        |
| Koplanare Felder :            | <input type="checkbox"/> ja <input type="checkbox"/> nein                                                        | <input type="checkbox"/> ja <input type="checkbox"/> nein                                                        | <input type="checkbox"/> ja <input type="checkbox"/> nein                                                        |
| Isodosenplan :                | <input type="checkbox"/> ja <input type="checkbox"/> nein                                                        | <input type="checkbox"/> ja <input type="checkbox"/> nein                                                        | <input type="checkbox"/> ja <input type="checkbox"/> nein                                                        |
| CT/MRT – gestützt :           | <input type="checkbox"/> ja <input type="checkbox"/> nein                                                        | <input type="checkbox"/> ja <input type="checkbox"/> nein                                                        | <input type="checkbox"/> ja <input type="checkbox"/> nein                                                        |
| 3 D Planung :                 | <input type="checkbox"/> ja <input type="checkbox"/> nein                                                        | <input type="checkbox"/> ja <input type="checkbox"/> nein                                                        | <input type="checkbox"/> ja <input type="checkbox"/> nein                                                        |
| Dosisvolumenhistogramm:       | <input type="checkbox"/> ja <input type="checkbox"/> nein                                                        | <input type="checkbox"/> ja <input type="checkbox"/> nein                                                        | <input type="checkbox"/> ja <input type="checkbox"/> nein                                                        |
|                               |                                                                                                                  |                                                                                                                  |                                                                                                                  |
| ICRU 50                       | <input type="checkbox"/> ja <input type="checkbox"/> nein                                                        | <input type="checkbox"/> ja <input type="checkbox"/> nein                                                        | <input type="checkbox"/> ja <input type="checkbox"/> nein                                                        |
| Umschließende Isodose         | %                                                                                                                |                                                                                                                  | %                                                                                                                |
| ½ Durchmesser                 | <input type="checkbox"/> ja <input type="checkbox"/> nein                                                        | <input type="checkbox"/> ja <input type="checkbox"/> nein                                                        | <input type="checkbox"/> ja <input type="checkbox"/> nein                                                        |
| Herdtiefe                     | cm                                                                                                               |                                                                                                                  | cm                                                                                                               |
| Sonstige Dosierung            |                                                                                                                  |                                                                                                                  |                                                                                                                  |
| Simulation                    | <input type="checkbox"/> ja <input type="checkbox"/> nein                                                        | <input type="checkbox"/> ja <input type="checkbox"/> nein                                                        | <input type="checkbox"/> ja <input type="checkbox"/> nein                                                        |
| Kobalt 60                     | <input type="checkbox"/> ja <input type="checkbox"/> nein                                                        | <input type="checkbox"/> ja <input type="checkbox"/> nein                                                        | <input type="checkbox"/> ja <input type="checkbox"/> nein                                                        |
| Linac- Photonen               | <input type="checkbox"/> ja <input type="checkbox"/> nein                                                        | <input type="checkbox"/> ja <input type="checkbox"/> nein                                                        | <input type="checkbox"/> ja <input type="checkbox"/> nein                                                        |
| Linac-Elektronen:<br>Energie: | <input type="checkbox"/> ja <input type="checkbox"/> nein<br>_____ MeV                                           | <input type="checkbox"/> ja <input type="checkbox"/> nein<br>_____ MeV                                           | <input type="checkbox"/> ja <input type="checkbox"/> nein<br>_____ MeV                                           |
| Neutronen                     | <input type="checkbox"/> ja <input type="checkbox"/> nein                                                        | <input type="checkbox"/> ja <input type="checkbox"/> nein                                                        | <input type="checkbox"/> ja <input type="checkbox"/> nein                                                        |
| Protonen                      | <input type="checkbox"/> ja <input type="checkbox"/> nein                                                        | <input type="checkbox"/> ja <input type="checkbox"/> nein                                                        | <input type="checkbox"/> ja <input type="checkbox"/> nein                                                        |
| Mischtechnik                  | <input type="checkbox"/> ja <input type="checkbox"/> nein                                                        | <input type="checkbox"/> ja <input type="checkbox"/> nein                                                        | <input type="checkbox"/> ja <input type="checkbox"/> nein                                                        |
| Bolusmaterial                 | <input type="checkbox"/> ja <input type="checkbox"/> nein                                                        | <input type="checkbox"/> ja <input type="checkbox"/> nein                                                        | <input type="checkbox"/> ja <input type="checkbox"/> nein                                                        |
| Stereotakt. Bestrahlung       | <input type="checkbox"/> ja <input type="checkbox"/> nein                                                        | <input type="checkbox"/> ja <input type="checkbox"/> nein                                                        | <input type="checkbox"/> ja <input type="checkbox"/> nein                                                        |

**Bestrahlungstechnik**

- Brachytherapie:
  - endoluminal     interstitiell     Flab-Technik     Seed-Implantation
- Intraoperative Bestrahlung
  - Elektronen     Brachytherapie (Flab)
- Offene Radionuklide

- Lagerungshilfe (welche?)     Gesichtsmaske     Vakuumpkissen     Gipsschale  
 Sedierung/Kurznaarkose     Stereotaxierung  
 andere.....

**Bestrahlungsplanung (bei 2 Tumorlokalisationen bitte eine 2. Tabelle verwenden)**

|                                  | Zielvolumen I                                                                                                         | Zielvolumen II                                                                                                        | Zielvolumen III                                                                                                       |
|----------------------------------|-----------------------------------------------------------------------------------------------------------------------|-----------------------------------------------------------------------------------------------------------------------|-----------------------------------------------------------------------------------------------------------------------|
| Bestrahlungsbeginn :             |                                                                                                                       |                                                                                                                       |                                                                                                                       |
| Bestrahlungsende :               |                                                                                                                       |                                                                                                                       |                                                                                                                       |
| Anzahl der Bestrahlungstage :    |                                                                                                                       |                                                                                                                       |                                                                                                                       |
| Bestrahlungspausen :             | <input type="checkbox"/> ja , <input type="checkbox"/> <input type="checkbox"/> Tage<br><input type="checkbox"/> nein | <input type="checkbox"/> ja , <input type="checkbox"/> <input type="checkbox"/> Tage<br><input type="checkbox"/> nein | <input type="checkbox"/> ja , <input type="checkbox"/> <input type="checkbox"/> Tage<br><input type="checkbox"/> nein |
| Grund :                          |                                                                                                                       |                                                                                                                       |                                                                                                                       |
| Gesamtdosis im Zielvolumen(Gy) : |                                                                                                                       |                                                                                                                       |                                                                                                                       |
| Einzeldosis (Gy) :               |                                                                                                                       |                                                                                                                       |                                                                                                                       |
| Fraktionierung:                  | ..... x..... Gy /Woche                                                                                                | ..... x..... Gy /Woche                                                                                                | ..... x..... Gy /Woche                                                                                                |

Bemerkungen:.....

- Ganzkörperbestrahlung

Datum der Behandlung:.....

|                          |                      |               |  |
|--------------------------|----------------------|---------------|--|
| Einzeldosis (Gy) :       |                      | Lungendosis : |  |
| Fraktionierung:          | ..... x..... Gy /Tag | Leberdosis    |  |
| Ganzkörperdosis (gesamt) |                      | Nierendosis : |  |
| Dosisleistung :          |                      |               |  |

**Bereits früher Strahlentherapie erfolgt?**     nein     ja

falls ja, Zielgebiet:.....

Dosis:.....Gy

Bestrahlungsjahr:.....

Operation im Bestrahlungsfeld : ja nein nicht bekannt  
vor Bestrahlung erfolgt : ja nein  
nach Bestrahlung vorgesehen: ja nein

Art der Operation:.....

Chemotherapie vor Radiotherapie : ja nein nicht bekannt

Substanzen:.....

.....

Chemotherapie simultan zur Radiotherapie: ja nein nicht bekannt

Substanzen:.....

.....

Chemotherapie nach Radiotherapie : ja nein nicht bekannt

Substanzen:.....

.....

Therapieassoziierte Akut-Toxizität EORTC / RTOG Grad 3 oder 4 während der Strahlentherapie

a).....

b).....

c).....

.....  
Datum

.....  
Name des Arztes

.....  
Unterschrift/Klinikstempel

## Zielgebiet der Bestrahlung

|    |                            |  |    |                              |
|----|----------------------------|--|----|------------------------------|
| 1  | Haut                       |  |    | <b>Abdomen</b>               |
| 2  | Ganzkörper                 |  | 42 | Abdomen                      |
| 3  | Halbkörper                 |  | 43 | Leber                        |
|    | <b>ZNS</b>                 |  | 44 | Leberhilus                   |
| 81 | kraniospinale Achse        |  | 45 | Milz, Milzstiel              |
| 4  | Hirnschädel                |  | 46 | Magen                        |
| 5  | Großhirn                   |  | 47 | Paraaortale LK               |
| 6  | Kleinhirn                  |  | 48 | Pankreas                     |
| 7  | Hirnstamm                  |  | 49 | Niere                        |
| 8  | Hypophyse                  |  | 50 | Nebenniere                   |
| 9  | Pinealisloge               |  | 51 | Iliakale LK                  |
| 10 | Suprasellär                |  | 52 | Inguinale LK                 |
| 11 | Kalotte                    |  | 53 | Kleines Becken               |
| 12 | Siebbein                   |  | 54 | Beckenwand                   |
| 13 | Orbita                     |  | 55 | Rectum                       |
| 14 | Retrobulbär                |  | 56 | Sakralhöhle                  |
|    | <b>Kopf-Hals</b>           |  | 57 | Anal                         |
| 15 | Wange                      |  | 58 | Blase                        |
| 16 | Waldeyerscher Rachenring   |  | 59 | Prostata                     |
| 17 | Tonsille                   |  | 60 | Hoden                        |
| 18 | Schilddrüse                |  | 61 | Uterus                       |
| 19 | Epipharynx                 |  | 62 | Parametrien                  |
| 20 | Mesopharynx                |  | 63 | Ovar                         |
| 21 | Hypophaynx                 |  | 64 | Vagina                       |
| 22 | Oberkiefer                 |  | 65 | Vulva                        |
| 23 | Unterkiefer                |  |    | <b>Myelon + Wirbelkörper</b> |
| 24 | Kieferhöhle                |  | 66 | Myelon                       |
| 25 | Zunge                      |  | 67 | HWS                          |
| 26 | Mundboden                  |  | 68 | BWS                          |
| 27 | Larynx                     |  | 69 | LWS                          |
| 28 | Submentale LK              |  | 70 | Sacrum                       |
| 29 | Cervikale LK               |  | 71 | Paravertebral                |
| 30 | Supra-/infraclavikuläre LK |  |    | <b>Extremitäten</b>          |
|    | <b>Thorax</b>              |  | 72 | Schulter / Hals              |
| 31 | Mediastinum                |  | 73 | Oberarm                      |
| 32 | Hilomediastinal            |  | 74 | Unterarm                     |
| 33 | Hilus                      |  | 75 | Hand                         |
| 34 | Oesophagus                 |  | 76 | Hüfte                        |
| 35 | Herz / Myocard             |  | 77 | Oberschenkel                 |
| 36 | Lunge                      |  | 78 | Unterschenkel                |
| 37 | Lunge zentral              |  | 79 | Fuß                          |
| 38 | Lunge peripher             |  |    |                              |
| 39 | Brustwand                  |  | 80 | Sonstige:                    |
| 40 | Mamma                      |  |    |                              |
| 41 | Axilla                     |  |    |                              |

# RiSK

## RADIODTHERAPIE – DOKUMENTATION

### - Organdosen -

#### Richtlinien zur Organdosendokumentation:

- **Im Folgenden werden lediglich die Bestrahlungsdosen von Organen oder Organbereichen im Strahlenfeld dokumentiert. Strahlenexposition außerhalb des Strahlenfeldes soll nur für die Ovarien / Hoden und die Schilddrüse angegeben werden.**
- **Bei Schilddrüse und Hoden ist die dosimetrische Erfassung vorgesehen. Dabei sollten wenn möglich mehrere Messpunkte über das Organ verteilt gewählt werden. Bei einer Messung eines einzelnen Punktes sollte eine repräsentative Stelle in der Mitte des Organs gewählt werden.**
- **Für Lunge, Herz, Leber und Nieren müssen die Dosen aus dem Dosisvolumen-histogramm angegeben werden.**
- **D-max: maximale Punktdosis im Organ  
D-min: minimale Punktdosis im Organ**
- **I. Teil: Dokumentation von Dosen an Knochen, Weichteilen, Gelenken  
II. Teil: Dokumentation nach Organen, von kranial nach kaudal gegliedert.**

*I. Teil*

**KNOCHENMARK**

**Bitte Feldkontur anzeichnen**

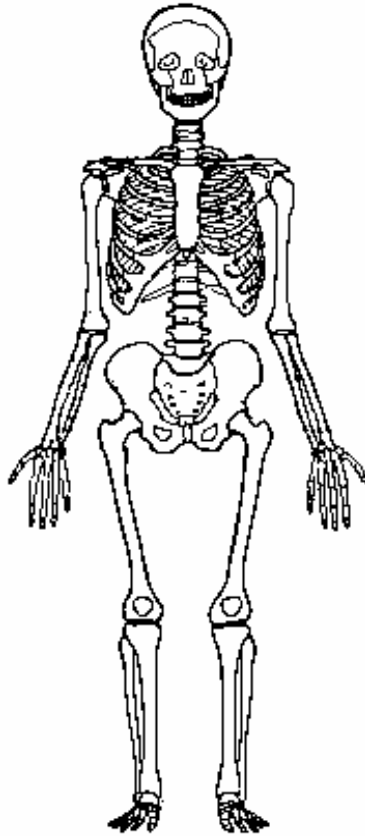

(Bestrahlungsbereich markieren)

**WIRBELSÄULE UND RÜCKENMARK**

**Dosisdokumentation und Toxizitätsnachsorge für Wirbelkörper und Myelon ab 10 Gy**

**Angabe der bestrahlten Wirbelkörper:** von.....bis.....

D-max in den bestrahlten WK: .....Gy      D-min in den bestrahlten WK:.....Gy

**Dosisgradient unterhalb 20Gy im Wirbelkörper?**       ja       nein

**Angabe der bestrahlten Myelonabschnitte:** von.....bis.....

D-max im bestrahlten Segment: .....Gy      D-min im bestrahlten Segment:.....Gy

# BEWEGUNGSAPPARAT

## KNOCHEN UND WEICHTEILE

Dosisdokumentation und Toxizitätsnachsorge wenn mit  $\geq 10$  Gy bestrahlt

|            | D-max (Gy) | Gesamter Knochen im Zielvolumen |
|------------|------------|---------------------------------|
| Kalotte    |            | _____                           |
| Rippen re. |            | _____                           |
| Rippen li. |            | _____                           |
| Becken re. |            |                                 |
| Becken li. |            |                                 |
| Sacrum     |            |                                 |

|                  | D-max (Gy) | Gesamter Knochen im ZV |      | proximale Epiphysenfuge im Feld |          |       | distale Epiphysenfuge im Feld |          |       |
|------------------|------------|------------------------|------|---------------------------------|----------|-------|-------------------------------|----------|-------|
|                  |            | Ja                     | nein | ja                              | partiell | nein  | Ja                            | partiell | nein  |
| Oberarm re.      |            |                        |      |                                 |          |       |                               |          |       |
| Radius re.       |            |                        |      |                                 |          |       |                               |          |       |
| Ulna re.         |            |                        |      |                                 |          |       |                               |          |       |
| Hand re.         |            |                        |      | _____                           | _____    | _____ | _____                         | _____    | _____ |
| Oberschenkel re. |            |                        |      |                                 |          |       |                               |          |       |
| Tibia re.        |            |                        |      |                                 |          |       |                               |          |       |
| Fibula re.       |            |                        |      |                                 |          |       |                               |          |       |
| Fuß re.          |            |                        |      | _____                           | _____    | _____ | _____                         | _____    | _____ |
|                  |            |                        |      |                                 |          |       |                               |          |       |
| Oberarm li.      |            |                        |      |                                 |          |       |                               |          |       |
| Radius li.       |            |                        |      |                                 |          |       |                               |          |       |
| Ulna li.         |            |                        |      |                                 |          |       |                               |          |       |
| Hand li.         |            |                        |      | _____                           | _____    | _____ | _____                         | _____    | _____ |
| Oberschenkel li. |            |                        |      |                                 |          |       |                               |          |       |
| Tibia li.        |            |                        |      |                                 |          |       |                               |          |       |
| Fibula li        |            |                        |      |                                 |          |       |                               |          |       |
| Fuß li.          |            |                        |      | _____                           | _____    | _____ | _____                         | _____    | _____ |

Gesamte Extremitäten-Zirkumferenz im Feld :  ja (ohne Lymphstreifen)  nein

## GELENKE

Dosisdokumentation und Toxizitätsnachsorge für Gelenke wenn mit  $\geq 20$  Gy bestrahlt

Gelenke im Bestrahlungsfeld:  nein  ja

|                           | Rechts (Gy) | Links (Gy) |
|---------------------------|-------------|------------|
| Schultergelenk            |             |            |
| Ellenbogengelenk          |             |            |
| Handgelenk (radio-carpal) |             |            |
| Hüftgelenk                |             |            |
| Kniegelenk                |             |            |
| Sprunggelenk              |             |            |



## II. Teil (Organdosen)

### ZNS

#### Dosisdokumentation und Toxizitätsnachsorge, wenn im Zielvolumen

**Helmfeld bei ZNS Prophylaxe / ZNS-Befall bei ALL / AML**

verordnete Dosis:.....Gy

Dosimetrie Schilddrüse: ermittelte Gesamtdosis:...../...../...../...../.....Gy

(oder Dosisangabe aus Plan), alternativ: Abstand der Schilddrüse vom Feldrand:.....cm

**(keine weitere Dokumentation nötig)**

**Ganzhirn-Bestrahlung,** verordnete Dosis:..... Gy

**kranio-spinale Bestrahlung,** verordnete Dosis:..... Gy

Boost spinal:  nein  ja: kumulative Dosis:.....Gy  
Myelonabschnitt:.....

Aufsättigung hintere Schädelgrube:.....Gy

Boost cerebral:  nein  ja: kumulative Dosis:.....Gy  
Region:.....

**Teilhirn-Bestrahlung**

< 20 Gy → keine Dokumentation notwendig

> 20 Gy

|                 | D-max (Gy) | D-min (Gy) |
|-----------------|------------|------------|
| Hypophyse       |            |            |
| Chiasma opticum |            |            |
| Hirnstamm       |            |            |

**Rückenmark: siehe Teil I**

### Orbita

#### Dosisdokumentation und Toxizitätsnachsorge bei jeder eingestrahelten Dosis.

|                    | D-max (Gy) | Gesamtes Organ im ZV |      |                    | D-max (Gy) | Gesamtes Organ im ZV |      |
|--------------------|------------|----------------------|------|--------------------|------------|----------------------|------|
|                    |            | ja                   | nein |                    |            | ja                   | nein |
| Auge re.           |            |                      |      | Auge li.           |            |                      |      |
| Linse re.          |            |                      |      | Linse li.          |            |                      |      |
| Tränendrüse re.    |            |                      |      | Tränendrüse li.    |            |                      |      |
| Nervus opticus re. |            |                      |      | Nervus opticus li. |            |                      |      |

### OHR

#### Dosisdokumentation und Toxizitätsnachsorge bei jeder eingestrahelten Dosis.

|               | D-max (Gy) |
|---------------|------------|
| Mittelohr re. |            |
| Innenohr re.  |            |

|               | D-max (Gy) |
|---------------|------------|
| Mittelohr li. |            |
| Innenohr li.  |            |

**Parallele Chemotherapie mit Cisplatin:**

ja  nein



## KEHLKOPF

### Dosisdokumentation und Toxizitätsnachsorge bei Bestrahlung $\geq 20$ Gy.

D-max: .....Gy

Ausmaß des bestrahlten Organanteils  $\geq 20$  Gy:   $< 1/3$       $1/3 - 2/3$       $> 2/3$   
 komplett

## MAMMA

### Dosisdokumentation und Toxizitätsnachsorge bei jeder eingestrahlenen Dosis.

|           | D-max (Gy) | Gesamte Mamma im ZV |      |
|-----------|------------|---------------------|------|
|           |            | Ja                  | Nein |
| Mamma re. |            |                     |      |
|           |            |                     |      |
| Mamma li. |            |                     |      |

Symmetrische Bestrahlung beider Mammae :  ja     nein

## ÖSOPHAGUS

### Dosisdokumentation und Toxizitätsnachsorge bei Teildosis $\geq 40$ Gy. Abschätzung der bestrahlten Länge anhand der Simulationsaufnahmen.

Bestrahlter Ösophagusabschnitt  $\geq 40$  Gy

von..... bis ..... (Angabe der Wirbelsegmente)

D-max im bestrahlten Segment: ..... Gy

## BAUCHSPEICHELDRÜSE

### Dosisdokumentation und Toxizitätsnachsorge bei (Teil)Bestrahlung $\geq 20$ Gy (Volumenabschätzung nach Simulation/Plan)

D-max:.....Gy

Ausmaß des bestrahlten Organanteils  $\geq 20$  Gy:   $< 1/3$   
  $1/3 - 2/3$   
  $> 2/3$   
 komplett

## HARNBLASE

### Dosisdokumentation und Toxizitätsnachsorge wenn im Zielvolumen.

D-max:.....Gy; Harnblase komplett im ZV:  nein     ja

## DOSISVOLUMENHISTOGRAMM

### HERZ

Dosisdokumentation und Toxizitätsnachsorge bei einer Dosis  $\geq 15$  Gy. Erfassung auch bei infradiaphragmaler Bestrahlung. Dosisvolumenhistogramm!

### LUNGE

Dosisdokumentation und Toxizitätsnachsorge bei einer Ganzlungendosis  $\geq 10$  Gy bzw. Teillungendosis  $\geq 18$  Gy. Dosisvolumenhistogramm!

### LEBER

Dosisdokumentation und Toxizitätsnachsorge bei Bestrahlung vom  $\geq 1/3$  der Leber und/oder Teilelberbestrahlung  $\geq 20$  Gy. Dosisvolumenhistogramm!

### NIEREN

Bestrahlungsdokumentation und Toxizitätsnachsorge, wenn  $\geq 1/2$  einer Niere bestrahlt ist und/oder eine Teilorgandosis von  $\geq 12$  Gy vorliegt.  
Dosisvolumenhistogramm!

|                                                                     | Dosis  | Herz | Lunge li. | Lunge re. | Lunge gesamt | Leber | Niere li. | Niere re. |
|---------------------------------------------------------------------|--------|------|-----------|-----------|--------------|-------|-----------|-----------|
| Alternativ:<br>DVH in<br>Kopie<br>oder<br>Eintrag in<br>die Tabelle | > 5 Gy | %    | %         | %         | %            | %     | %         | %         |
|                                                                     | >10 Gy | %    | %         | %         | %            | %     | %         | %         |
|                                                                     | >15 Gy | %    | %         | %         | %            | %     | %         | %         |
|                                                                     | >20 Gy | %    | %         | %         | %            | %     | %         | %         |
|                                                                     | >30 Gy | %    | %         | %         | %            | %     | %         | %         |
|                                                                     | >40 Gy | %    | %         | %         | %            | %     | %         | %         |
|                                                                     | >50 Gy | %    | %         | %         | %            | %     | %         | %         |
|                                                                     | >60 Gy | %    | %         | %         | %            | %     | %         | %         |

**Vorbestehende Funktionseinschränkungen an Herz, Lunge, Leber, Niere:**

nein       ja,

welche.....

.....

### DÜNN- UND DICKDARM

Dosisdokumentation und Toxizitätsnachsorge bei (Teil)Abdomenbestrahlung  $\geq 10$  Gy.  
(Volumenabschätzung nach Simulation/Plan)

**Dünndarm:**      D-max:.....Gy

**Dickdarm:**      D-max:.....Gy

Ausmaß des bestrahlten Organanteils  $\geq 20$  Gy:

$< 1/3$

$< 1/3$

$1/3 - 2/3$

$1/3 - 2/3$

$> 2/3$

$> 2/3$

komplett

komplett

..



| <input type="checkbox"/> <input type="checkbox"/> <input type="checkbox"/> <input type="checkbox"/><br>Nr. Datum |                                                                          | <b>Max. akute Nebenwirkungen nach Radiotherapie bei Kindern (RTOG/EORTC)</b>                                                                                                     |                                                                                                                                                                                              |                                                                                                                                                                                                                                                                 | Pat.Name, Geb.-Dat.                                                                                                                                                                          |  |
|------------------------------------------------------------------------------------------------------------------|--------------------------------------------------------------------------|----------------------------------------------------------------------------------------------------------------------------------------------------------------------------------|----------------------------------------------------------------------------------------------------------------------------------------------------------------------------------------------|-----------------------------------------------------------------------------------------------------------------------------------------------------------------------------------------------------------------------------------------------------------------|----------------------------------------------------------------------------------------------------------------------------------------------------------------------------------------------|--|
| <b>Allgemeinzustand, Karnofsky</b>                                                                               | <b>0</b> normal<br>Kl: 100%                                              | <b>1</b> Gering geminderte Aktivität; voll ambulanz, Kl: 70–80%                                                                                                                  | <b>2</b> Deutlich geminderte Leistungskraft; tags > 50% ambulanz, Aktivität deutl. eingeschränkt. Kl: 50–60%                                                                                 | <b>3</b> Stark geminderte Leistungskraft; tags > 50% bettlägerig; pflegebedürftig Kl: 30–40%                                                                                                                                                                    | <b>4</b> Lebensbedrohlicher Zustand; ständig bettlägerig und voll pflegebedürftig; Kl: < 30%                                                                                                 |  |
| <b>Knochenmark</b>                                                                                               | <b>0</b>                                                                 | <b>1</b>                                                                                                                                                                         | <b>2</b>                                                                                                                                                                                     | <b>3</b>                                                                                                                                                                                                                                                        | <b>4</b>                                                                                                                                                                                     |  |
| Leukozyten (N/µl)                                                                                                | ≥ 4.000                                                                  | 3.000 - < 4.000                                                                                                                                                                  | 2.000 - < 3.000                                                                                                                                                                              | 1.0 - < 2.000                                                                                                                                                                                                                                                   | < 1.000                                                                                                                                                                                      |  |
| Neutrophile (N/µl)                                                                                               | ≥ 2.000                                                                  | < 2.000 - 1.500                                                                                                                                                                  | < 1.500 - 1.000                                                                                                                                                                              | < 1.000 - 500                                                                                                                                                                                                                                                   | < 500 / Sepsis                                                                                                                                                                               |  |
| Thrombozyten (*10 <sup>3</sup> /µl)                                                                              | ≥ 100                                                                    | 75 - < 100                                                                                                                                                                       | 50 - < 75                                                                                                                                                                                    | 10,0 - < 50                                                                                                                                                                                                                                                     | < 10,0                                                                                                                                                                                       |  |
| Hämoglobin (g/dl)                                                                                                | Altersnorm                                                               | 10,0 - < N                                                                                                                                                                       | 8,0 - < 10,0                                                                                                                                                                                 | 6,5 - < 8,0                                                                                                                                                                                                                                                     | < 6,5                                                                                                                                                                                        |  |
| <b>Haut / Unterhaut</b>                                                                                          | <b>0</b> normal                                                          | <b>1</b> Geringes, blasses Erythem; Haarausfall; trockene Desquamation, reduzierte Schweißsekretion.                                                                             | <b>2</b> Mäßiges Erythem, vereinzelt feuchte Epitheliolyse (≤ 50%), mäßiges Ödem; (lokale Therapie nötig)                                                                                    | <b>3</b> (Ausgeprägtes Erythem), konfluierende feuchte Epitheliolyse (> 50%), starkes Ödem; (intensive Therapie nötig)                                                                                                                                          | <b>4</b> Ulzeration, Nekrose, Blutung (operative Therapie nötig)                                                                                                                             |  |
| <b>Schleimhäute</b>                                                                                              | <b>0</b> normal                                                          | <b>1</b> Geringes Enanthem oder Beläge, evtl. geringe Schmerzen, keine Analgetika nötig.                                                                                         | <b>2</b> (Mäßig) schmerzhaft, fleckförmige Mukositis mit entzündlichen serosanguinösen Belägen, milde Analgetika                                                                             | <b>3</b> Konfluierend fibrinöse Mukositis; evtl. starke Schmerzen, die zentral wirksame Analgetika nötig machen                                                                                                                                                 | <b>4</b> Ulzeration, Blutung oder Nekrose; (PEG / parenterale Ernährung)                                                                                                                     |  |
| <b>Speicheldrüsen</b>                                                                                            | <b>0</b> normal                                                          | <b>1</b> Geringe Mundtrockenheit; zäher Speichel; geringe Geschmacksstörung, z.B. metallisch; normale Kostform (etwas mehr Flüssigkeit)                                          | <b>2</b> Mäßige bis nahezu vollständige Mundtrockenheit, sehr zäher Speichel; mäßige Geschmacksstörung; (viel Flüssigkeit, feste bis breiige Nahrung)                                        | <b>3</b> Komplette Mundtrockenheit; kompletter Geschmacksverlust; keine festen Speisen mehr, flüssige Nahrung                                                                                                                                                   | <b>4</b> Akute Nekrose oder Ulzeration im Bereich der Speicheldrüsen. (PEG / parenterale Ernährung)                                                                                          |  |
| <b>Pharynx/ Ösophagus</b>                                                                                        | <b>0</b> normal                                                          | <b>1</b> Geringe Dysphagie oder Odynophagie; evtl. lokale Anästhetika oder milde Analgetika; evtl. breiige Nahrung                                                               | <b>2</b> Mäßige Dysphagie oder Odynophagie; evtl. (starke Anästhetika und) zentral wirksame Analgetika; evtl. breiige oder flüssige Nahrung                                                  | <b>3</b> Ausgeprägte Dysphagie oder Odynophagie mit Dehydratation oder Gewichtsverlust (>15% vom Ausgangsgewicht), NG / PEG-Sonde nötig oder i.v. Lösungen oder Hyperalimentation                                                                               | <b>4</b> Komplette Obstruktion; (tiefe) Ulzeration, Perforation oder Fistel; (PEG / parenterale Ernährung)                                                                                   |  |
| <b>Kehlkopf</b>                                                                                                  | <b>0</b>                                                                 | <b>1</b> Geringe intermittierende Heiserkeit / Reizhusten; geringes Schleimhauterythem, Stimmbandödem; (keine Therapie)                                                          | <b>2</b> Ständige Heiserkeit, Sprechen möglich, Hals- und Ohrschmerzen, fleckiges fibrinöses Exsudat oder mäßiges Stimmbandödem, keine Analgetika nötig; (mäßiger) Husten, Antitussiva nötig | <b>3</b> Flüstersprache; starke Hals- oder Ohrschmerzen, zentrale Analgetika nötig; konfluierend fibrinöses Exsudat, ausgeprägtes Stimmbandödem                                                                                                                 | <b>4</b> Massive Dyspnoe, Stridor oder Hämoptysen, Intubation oder Tracheostomie erforderlich.                                                                                               |  |
| <b>Lunge</b>                                                                                                     | <b>0</b> normale Blutgase: pO <sub>2</sub> : > 85; pCO <sub>2</sub> < 40 | <b>1</b> Geringe Symptomatik oder trockener Reizhusten oder geringe Belastungsdyspnoe pO <sub>2</sub> : 71-85; pCO <sub>2</sub> : 41-50                                          | <b>2</b> Mäßiger, permanenter Reizhusten, zentrale Antitussiva nötig; deutliche Belastungsdyspnoe pO <sub>2</sub> : 61-70; pCO <sub>2</sub> : 51-60                                          | <b>3</b> Ausgeprägter auf zentrale Antitussiva refraktärer Husten; starke Ruhedyspnoe; klinisch oder radiologisch akute interstitielle Pneumonitis pO <sub>2</sub> : 51-60; pCO <sub>2</sub> : 61-70 (immer wieder O <sub>2</sub> - und Steroide nötig)         | <b>4</b> Massive respiratorische Insuffizienz; pO <sub>2</sub> < 50; pCO <sub>2</sub> > 70) ständige O <sub>2</sub> -Gabe oder kontrollierte Beatmung nötig                                  |  |
| <b>Herz</b>                                                                                                      |                                                                          |                                                                                                                                                                                  |                                                                                                                                                                                              |                                                                                                                                                                                                                                                                 |                                                                                                                                                                                              |  |
| <b>Arrhythmie</b>                                                                                                | <b>0</b> keine                                                           | <b>1</b> Asympt., keine Therapie                                                                                                                                                 | <b>2</b> rekur. / persist., keine Therapie                                                                                                                                                   | <b>3</b> Therapie erforderlich                                                                                                                                                                                                                                  | <b>4</b> (Hypotension, ventr. Arrhth., Defibrillation)                                                                                                                                       |  |
| <b>Herzfunktion</b>                                                                                              | <b>0</b> normal                                                          | <b>1</b> Asymptomat. EF ↓ (Ruhe) > = 10 % aber < 20 % vom Ausgangswert                                                                                                           | <b>2</b> Asymptomat., aber EF ↓ (Ruhe) unter dem unteren Normwert für EF (Arbeit) oder EF ↓ > = 20 % vom Ausgangswert                                                                        | <b>3</b> Milde CHF, therapeutisch kompensiert                                                                                                                                                                                                                   | <b>4</b> schwere / refraktäre CHF oder Notwendigkeit der Intubation                                                                                                                          |  |
| <b>Echocardio: LV-SF %</b>                                                                                       | <b>0</b> > = 30                                                          | <b>1</b> > = 24 - < 30                                                                                                                                                           | <b>2</b> > = 20 - < 24                                                                                                                                                                       | <b>3</b> > 15 - < 20                                                                                                                                                                                                                                            | <b>4</b> < = 15                                                                                                                                                                              |  |
| <b>Oberer GI-Trakt, Magen und Dünndarm</b>                                                                       | <b>0</b> normal                                                          | <b>1</b> Geringe Anorexie (≤ 5% Gewichtsverlust), Übelkeit; (einmaliges Erbrechen); geringe abdominale Schmerzen; keine spezifische Therapie (Parasympatolytika oder Analgetika) | <b>2</b> Mäßige Anorexie (≤ 15% Gewichtsverlust), Übelkeit oder Erbrechen (2 bis 5 mal), Antiemetika nötig, mäßige Bauchschmerzen: leichte Parasympatolytika oder Analgetika nötig)          | <b>3</b> Ausgeprägte Anorexie (> 15% Gewichtsverlust); Übelkeit oder Erbrechen (6 bis 10 mal); NG / PEG-Sonde oder parenterale Ernährung nötig; ausgeprägte Bauchschmerzen trotz Medikation; Hämatemesis, Mälena; starke Blähungen (Rö:weitgestellte Darmschl.) | <b>4</b> Ileus; (sub) akute Darmobstruktion Fistel, Perforation; GI-Blutung, Transfusionen nötig; massivste Bauchkrämpfe, die operative Druckentlastung oder Umgehungsoperation nötig machen |  |

|                                                             |                         |                                                                                                                                                                                 |                                                                                                                                                                                         |                                                                                                                                                                                                                             |                                                                                                                                                                                 |
|-------------------------------------------------------------|-------------------------|---------------------------------------------------------------------------------------------------------------------------------------------------------------------------------|-----------------------------------------------------------------------------------------------------------------------------------------------------------------------------------------|-----------------------------------------------------------------------------------------------------------------------------------------------------------------------------------------------------------------------------|---------------------------------------------------------------------------------------------------------------------------------------------------------------------------------|
| <b>Unterer GI-Trakt; Dick- und Enddarm mit Beckenregion</b> | <b>0</b> normal         | <b>1</b> Öfter Stuhlgang oder veränderte (reduzierte) Stuhlkonsistenz, keine Medikamente nötig; (geringe) rektale Beschwerden, keine Analgetika nötig.                          | <b>2</b> (Mäßige) Diarrhoe Parasympatholytika nötig (z.B. Diphenoxylat); (häufig) Schleimabgänge, aber keine Einlagen nötig; rektale oder abdominale Tenesmen, milde Analgetika nötig.  | <b>3</b> (Ausgeprägte) Diarrhoe die parenterale Ernährung nötig macht. Ausgeprägte Blut- und Schleimabgänge, Einlagen nötig; starke Blähungen (Röntgen zeigt weite Darmschlingen); (zentral wirksame Analgetika)            | <b>4</b> (Sub) akute Darmobstruktion ( Ileus), Darmfistel oder Perforation; Darmblutung, Transfusion nötig; schwerste abdominale Schmerzen, operative Entlastung oder Umleitung |
| <b>Leber</b>                                                | <b>0</b> normal         | <b>1</b> Geringe Müdigkeit, Übelkeit, Dyspepsie,                                                                                                                                | <b>2</b> Mäßige Symptomatik (Müdigkeit, Übelkeit, Dyspepsie)                                                                                                                            | <b>3</b> Ausgeprägte Leberinsuffizienz                                                                                                                                                                                      | <b>4</b> Lebernekrose, hepatogene(s) Koma oder Enzephalopathie; (parenterale Ernährung, portocavaler Shunt erforderlich)                                                        |
| <b>Bilirubin</b>                                            | <b>0</b> Altersnorm (N) | <b>1</b> > N – 1,5 x N                                                                                                                                                          | <b>2</b> > 1,5 – 3,0 x N                                                                                                                                                                | <b>3</b> > 3,0 – 10,0 x N                                                                                                                                                                                                   | <b>4</b> > 10,0 x N                                                                                                                                                             |
| <b>S-GOT / S-GPT</b>                                        | <b>0</b> Altersnorm (N) | <b>1</b> > N – 2,5 x N                                                                                                                                                          | <b>2</b> > 2,5 – 5,0 x N                                                                                                                                                                | <b>3</b> > 5,0 – 20,0 x N                                                                                                                                                                                                   | <b>4</b> > 20,0 x N                                                                                                                                                             |
| <b>Urogenitaltrakt (und Niere)</b>                          | <b>0</b> normal         | <b>1</b> Wasserlassen / Nykturie 2 mal häufiger als sonst; (geringe) Dysurie und Harndrang; keine Medikamente                                                                   | <b>2</b> Wasserlassen oder Nykturie viel häufiger als sonst, <1 mal/ h; (mäßige) Dysurie, Harndrang und Blasenkrämpfe, lokale Anästhetika nötig (z.B. Phenazopyridin)                   | <b>3</b> Wasserlassen oder Nykturie sehr häufig, >1 mal/ h; ausgeprägte Dysurie, Beckenschmerzen und Blasenkrämpfe, regelmäßig zentral wirksame Analgetika(Narkotika) nötig; ausgeprägte Hämaturie mit oder ohne Blutkoagel | <b>4</b> (Lebensbedrohliche) Hämaturie, Bluttransfusionen nötig, akute Blasenobstruktion, nicht infolge Hämaturie oder Blutkoageln, Ulzeration oder Nekrose                     |
| <b>Kreatinin (mg%)</b>                                      | <b>0</b> Altersnorm (N) | <b>1</b> > N – 1,5 x N                                                                                                                                                          | <b>2</b> > 1,5 – 3,0 x N                                                                                                                                                                | <b>3</b> > 3,0 – 6,0 x N                                                                                                                                                                                                    | <b>4</b> > 6,0 x N                                                                                                                                                              |
| <b>Kreatinin-Clearence</b>                                  | > 90                    | 60 – 89                                                                                                                                                                         | 40 – 59                                                                                                                                                                                 | 20 – 39                                                                                                                                                                                                                     | < 19                                                                                                                                                                            |
| <b>Proteinurie (g/i)</b>                                    | keine                   | < 3                                                                                                                                                                             | 3 – 10,0                                                                                                                                                                                | > 10,0                                                                                                                                                                                                                      | Nephrotisches Syndrom                                                                                                                                                           |
| <b>Hämaturie</b>                                            | keine                   | mikroskopisch                                                                                                                                                                   | makroskopisch ohne Koageln                                                                                                                                                              | makroskopisch mit Koageln                                                                                                                                                                                                   | Transfusion erforderlich                                                                                                                                                        |
| <b>Harnleiter und Blase</b>                                 | <b>0</b> normal         | <b>1</b> Geringe Schleimhautatrophie; geringe (kleinflächige) Teleangiektasie; (Harndrang gering verstärkt); Mikrohämaturie                                                     | <b>2</b> Mäßig verstärkter Harndrang; generalisierte Teleangiektasie; zeitweilig Makrohämaturie; (Polyurie: > 6mal/Tag oder < einmal pro Stunde)                                        | <b>3</b> Massiver Harndrang (>einmal pro Stunde) und Dysurie; ausgeprägte generalisierte Teleangiektasie ( oft mit Patechien); häufige Hämaturie                                                                            | <b>4</b> Nekrose, (Perforation, Fistel) schwere Blasenkontraktur                                                                                                                |
| <b>Knochen</b>                                              | <b>0</b> normal         | <b>1</b> Keine Symptome; keine Wachstumsverzögerung; (gering) reduzierte Knochendichte                                                                                          | <b>2</b> Mäßige Schmerzen oder Spannungsgefühl; (mäßige) Wachstumsstörung; irreguläre Knochenklerosierung                                                                               | <b>3</b> Ausgeprägte Schmerzen oder Spannungsgefühl; völliger Wachstumsstillstand, dichte Knochenklerosierung                                                                                                               | <b>4</b> Nekrose bzw. Osteoradionekrose; Spontanfraktur                                                                                                                         |
| <b>Gelenke</b>                                              | <b>0</b> normal         | <b>1</b> Geringe Gelenksteife; (keine Symptome) geringe Funktionseinbußen                                                                                                       | <b>2</b> Mäßige Gelenksteife; zeitweilige oder mäßige Gelenkschmerzen; mäßige Funktionseinbußen                                                                                         | <b>3</b> Ausgeprägte Gelenksteife; ausgeprägte Gelenkschmerzen mit ausgeprägten Funktionseinbußen                                                                                                                           | <b>4</b> Nekrose, vollständige Gelenksteife (Ankylose mit Funktionsverlust)                                                                                                     |
| <b>Zentrales Nervensystem (Gehirn)</b>                      | <b>0</b> normal         | <b>1</b> Voller funktioneller Status (Arbeitsfähigkeit) mit geringen neurologischen Ausfällen; keine spezifische Therapie nötig                                                 | <b>2</b> (Mäßige) neurologische Ausfälle; häusliche Pflege, pflegerische Hilfe nötig; Medikation inkl. (niedrig dosiert) Steroide; evtl. Antikonvulsiva                                 | <b>3</b> (Ausgeprägte) neurologische Ausfälle, Krankenhauseinweisung für erste Therapiemaßnahmen nötig; (hochdosiert Steroide oder Antikonvulsiva)                                                                          | <b>4</b> Lebensbedrohliche neurologische Ausfälle (Paralyse, Koma), > 3 Krampfanfälle pro Woche trotz Medikation; Hospitalisierung                                              |
| <b>Peripheres Nervensystem (Rückenmark)</b>                 | <b>0</b> normal         | <b>1</b> Diskretes L'hermitte-Zeichen (Parästhesien; reduzierte Reflexe)                                                                                                        | <b>2</b> Ausgeprägte L'hermitte-Zeichen (mit Parästhesien oder Muskelschwäche)                                                                                                          | <b>3</b> Objektive (segmentale) neurologische Ausfälle (mit Parästhesien oder Paresen)                                                                                                                                      | <b>4</b> Mono-, Para-Teraplegie                                                                                                                                                 |
| <b>Augen</b>                                                | <b>0</b> normal         | <b>1</b> geringe Konjunktivitis mit oder ohne Sklerainjektion; verstärktes Augentränen, keine Therapie                                                                          | <b>2</b> Mäßige Konjunktivitis mit oder ohne Keratitis, Steroide oder Antibiotika nötig; „trockene Augen“, künstliche Tränenflüssigkeit nötig; Iritis mit dadurch bedingter Photophobie | <b>3</b> Ausgeprägte Keratitis mit Ulzeration der Kornea; objektiver Visusverlust bei Sehgenauigkeits-oder Gesichtsfeldanalyse; akutes Glaukom; Panophthalmitis                                                             | <b>4</b> (Massive ophthalmologische Komplikationen und Störungen) uni- oder bilaterale Erblindung                                                                               |
| <b>Ohren</b>                                                | <b>0</b> normal         | <b>1</b> Geringe Otitis externa mit Erythem und Juckreiz infolge von trockener Hautschuppung, keine Therapie; Audiometrie unverändert gegenüber der Ausgangslage (oder: <10 dB) | <b>2</b> Mäßigergrade (seröse) Otitis externa et media, lokale Medikamente nötig; nur im Test mäßige Hypakusis (oder: 10-15 dB); (zeitweilig Tinnitus)                                  | <b>3</b> Ausgeprägte (serisanguinöse) Otitis externa (et media); symptomatische Hypakusis (oder: >15-20 dB); (ständiger) Tinnitus, nicht medikamentös bedingt                                                               | <b>4</b> (Schwere Osteochondritis; Ulzeration, Nekrose) vollständige (ein- oder beidseitige) Ertaubung (oder :> 20 dB)                                                          |

.....  
Ausfüllender Arzt

.....  
Unterschrift/Klinikstempel

| <input type="checkbox"/> <input type="checkbox"/> <input type="checkbox"/> <input type="checkbox"/><br>Nr. Datum |                                                                     | <b>Chronische Strahlenfolgen bei Kindern<br/>(RTOG/EORTC)</b>                                                                                                                   |                                                                                                                                                                                                                       |                                                                                                                                                                                                                                  | Pat.Name, Geb.-Dat.                                                                                                                                                                             |  |
|------------------------------------------------------------------------------------------------------------------|---------------------------------------------------------------------|---------------------------------------------------------------------------------------------------------------------------------------------------------------------------------|-----------------------------------------------------------------------------------------------------------------------------------------------------------------------------------------------------------------------|----------------------------------------------------------------------------------------------------------------------------------------------------------------------------------------------------------------------------------|-------------------------------------------------------------------------------------------------------------------------------------------------------------------------------------------------|--|
| Status                                                                                                           | Komplette Remission                                                 | Progression                                                                                                                                                                     | Zweit-Malignom                                                                                                                                                                                                        | Verstorben                                                                                                                                                                                                                       | Todesdatum                                                                                                                                                                                      |  |
| Allgemeinzustand                                                                                                 | <b>0</b> normale Aktivität, keine Beeinträchtigung                  | <b>1</b> geringe Beeinträchtigung der Aktivität, jedoch keine zusätzliche Hilfe erforderlich                                                                                    | <b>2</b> altersentsprechende Aktivität stark eingeschränkt (z.B. kein regelmäßiger Kindergarten- bzw. Schulbesuch möglich)                                                                                            | <b>3</b> Bettlägerig, pflegebedürftig                                                                                                                                                                                            | <b>4</b> intensive Behandlung notwendig, schwerstkrank, moribund                                                                                                                                |  |
| Karnofsky                                                                                                        | <b>0</b> 100%                                                       | <b>1</b> 70–80%                                                                                                                                                                 | <b>2</b> 50–60%                                                                                                                                                                                                       | <b>3</b> 30–40%                                                                                                                                                                                                                  | <b>4</b> < 30%                                                                                                                                                                                  |  |
| Hb (g/dl)                                                                                                        | <b>0</b> Altersnorm                                                 | <b>1</b> 10,0 - < N                                                                                                                                                             | <b>2</b> 8 - < 10,0                                                                                                                                                                                                   | <b>3</b> 6,5 - < 8,0                                                                                                                                                                                                             | <b>4</b> < 6,5                                                                                                                                                                                  |  |
| Leuko (N/μl)                                                                                                     | <b>0</b> ≥ 4.000                                                    | <b>1</b> 3.000 - < 4.000                                                                                                                                                        | <b>2</b> 2.000 - < 3.000                                                                                                                                                                                              | <b>3</b> 1.000 - < 2.000                                                                                                                                                                                                         | <b>4</b> < 1.000                                                                                                                                                                                |  |
| Thrombo (1000/μl)                                                                                                | <b>0</b> ≥ 100                                                      | <b>1</b> 75 - < 100                                                                                                                                                             | <b>2</b> 50 - < 75                                                                                                                                                                                                    | <b>3</b> 10 - < 50                                                                                                                                                                                                               | <b>4</b> < 10                                                                                                                                                                                   |  |
| Haut                                                                                                             | <b>0</b> normal                                                     | <b>1</b> geringe Atrophie, Pigmentveränderungen, geringer Haarverlust                                                                                                           | <b>2</b> flächige Atrophie, mäßige Teleangiectasie (≤ 50%), völliger Haarverlust                                                                                                                                      | <b>3</b> ausgeprägte Atrophie, ausgeprägte Teleangiectasie (> 50%)                                                                                                                                                               | <b>4</b> Ulzeration, Nekrose, (operative Therapie nötig)                                                                                                                                        |  |
| Unterhautgewebe                                                                                                  | <b>0</b> normal                                                     | <b>1</b> geringe asymptotische Fibrose, ohne Kontraktur, gering reduziertes subkutanes Fettgewebe                                                                               | <b>2</b> mäßige, asymptotische Fibrose mit ≤ 10% linearer Kontraktur, mäßig reduziertes subkutanes Fettgewebe                                                                                                         | <b>3</b> ausgeprägte (symptomatische) Fibrose mit > 10% linearer Kontraktur, stark reduziertes subkutanes Fettgewebe                                                                                                             | <b>4</b> Ulzeration, Nekrose, (operative Therapie nötig)                                                                                                                                        |  |
| Schleimhäute                                                                                                     | <b>0</b> normal                                                     | <b>1</b> geringe Atrophie oder Trockenheit                                                                                                                                      | <b>2</b> mäßige Atrophie und Teleangiectasie; reduzierte Schleimproduktion                                                                                                                                            | <b>3</b> ausgeprägte Atrophie und Teleangiectasie, Verlust der Schleimproduktion                                                                                                                                                 | <b>4</b> Ulzeration, Nekrose, (operative Therapie nötig)                                                                                                                                        |  |
| Speicheldrüsen                                                                                                   | <b>0</b> normal                                                     | <b>1</b> geringe Mundtrockenheit aber gute Stimulierbarkeit (normale Kost/Ernährung)                                                                                            | <b>2</b> mäßige Mundtrockenheit, geringe Stimulierbarkeit, (viel Flüssigkeit, breiige Nahrung)                                                                                                                        | <b>3</b> komplette Mundtrockenheit, keine Stimulierbarkeit, (keine festen Speisen, flüssige Nahrung)                                                                                                                             | <b>4</b> Fibrose (komplette Atrophie) (PEG / parenterale Ernährung)                                                                                                                             |  |
| Pharynx/Ösophagus                                                                                                | <b>0</b> normal                                                     | <b>1</b> geringe Fibrose, geringe Schluckstörungen bei festen Speisen, keine Schmerzen beim Schlucken (normale Kostform/Ernährung)                                              | <b>2</b> (mäßige Fibrose), keine normale Aufnahme von festen Speisen, halb feste (breiige) Nahrung, Dilatation ggf. nötig                                                                                             | <b>3</b> ausgeprägte Fibrose (oder Dysphagie), nur Aufnahme von Flüssigkeit möglich, Dilatation nötig, Schmerzen beim Schlucken möglich                                                                                          | <b>4</b> Nekrose, Perforation, Fistel (operativer Eingriff nötig oder PEG/ parenterale Ernährung)                                                                                               |  |
| Larynx                                                                                                           | <b>0</b> normal                                                     | <b>1</b> (geringe) Heiserkeit (oder Reizhusten), geringes Stimmbandödem                                                                                                         | <b>2</b> (mäßige Heiserkeit oder Reizhusten), mäßiges Stimmbandödem, Chondritis (symptomatische Therapie)                                                                                                             | <b>3</b> („Flüstersprache“), ausgeprägtes Stimmbandödem, massive Chondritis, (intensive Lokalthherapie, Analgetika)                                                                                                              | <b>4</b> Nekrose, (massive Dyspnoe und Stridor, Ulzeration, Intubation oder Tracheotomie)                                                                                                       |  |
| Lunge                                                                                                            | <b>0</b> normal<br>pO <sub>2</sub> : > 85;<br>pCO <sub>2</sub> < 40 | <b>1</b> keine oder geringe Symptome (trockener Reizhusten); geringe radiologische Zeichen (geringe Belastungsdyspnoe)<br>pO <sub>2</sub> : 71-85; pCO <sub>2</sub> : 41-50     | <b>2</b> mäßig symptomatische Lungenfibrose oder Pneumonitis (massiver Husten); geringes Fieber; radiologisch fleckige Veränderungen; (mäßige Belastungsdyspnoe)<br>pO <sub>2</sub> : 61-70; pCO <sub>2</sub> : 51-60 | <b>3</b> Ausgeprägte symptomatische Lungenfibrose oder Pneumonitis; radiologisch dichte Veränderungen; (starke Ruhedyspnoe)<br>pO <sub>2</sub> : 51-60; pCO <sub>2</sub> : 61-70 (intensive medikamentöse Therapie)              | <b>4</b> Massive respiratorische Insuffizienz; permanente O <sub>2</sub> -gabe und kontrollierte Beatmung nötig<br>pO <sub>2</sub> < 50; pCO <sub>2</sub> > 70 (intensivmedizinische Maßnahmen) |  |
| Herz                                                                                                             |                                                                     |                                                                                                                                                                                 |                                                                                                                                                                                                                       |                                                                                                                                                                                                                                  |                                                                                                                                                                                                 |  |
| Arrhythmie                                                                                                       | <b>0</b> keine                                                      | <b>1</b> Asympt., keine Therapie                                                                                                                                                | <b>2</b> rekur. / persist. keine Therapie                                                                                                                                                                             | <b>3</b> Therapie erforderlich                                                                                                                                                                                                   | <b>4</b> (Hypotension, ventr. Arrhth., Defibrillation)                                                                                                                                          |  |
| Herzfunktion                                                                                                     | <b>0</b> normal                                                     | <b>1</b> Asymptomat. EF ↓ (Ruhe) > = 10 % aber < 20 % vom Ausgangswert                                                                                                          | <b>2</b> Asymptomat. EF ↓ (Ruhe) unter dem unteren Normwert für EF (Arbeit) oder EF ↓ > = 20 % vom Ausgangswert                                                                                                       | <b>3</b> Milde CHF, therapeutisch kompensiert                                                                                                                                                                                    | <b>4</b> schwere / refraktäre CHF oder Notwendigkeit der Intubation                                                                                                                             |  |
| Echo: LV-SF %                                                                                                    | <b>0</b> > = 30                                                     | <b>1</b> > = 24 - < 30                                                                                                                                                          | <b>2</b> > = 20 - < 24                                                                                                                                                                                                | <b>3</b> > 15 - < 20                                                                                                                                                                                                             | <b>4</b> < = 15                                                                                                                                                                                 |  |
| Oberer GI-Trakt                                                                                                  | <b>0</b> normal                                                     | <b>1</b> Geringe Anorexie (≤ 5% Gewichtsverlust); Übelkeit; (einmal Erbrechen); geringe abdominelle Schmerzen : keine spezifische Therapie (Parasympatholytika oder Analgetika) | <b>2</b> mäßige Anorexie (≤ 15% Gewichtsverlust); Übelkeit oder Erbrechen ( 2 bis 5 mal), Antiemetika nötig; mäßige Bauchschmerzen : leichte (Parasympatholytika oder) Analgetika nötig                               | <b>3</b> Ausgeprägte Anorexie (> 15% Gewichtsverlust); Übelkeit oder Erbrechen (6 bis 10mal); NG-/PEG-Sonde oder parenterale Ernährung nötig; ausgeprägte Bauchschmerzen trotz Medikation; Hämatemesis, Mälena; starke Blähungen | <b>4</b> Nekrose; Perforation, Fistel; komplette Obstruktion (Ileus); GI-Blutung; PEG oder parenterale Ernährung, Transfusionen, OP nötig                                                       |  |



|                                                                             |                                          |                                                                                                                             |                                                                                                                                           |                                                                                                                                                                        |                                                                                                                          |
|-----------------------------------------------------------------------------|------------------------------------------|-----------------------------------------------------------------------------------------------------------------------------|-------------------------------------------------------------------------------------------------------------------------------------------|------------------------------------------------------------------------------------------------------------------------------------------------------------------------|--------------------------------------------------------------------------------------------------------------------------|
| <b>Unterer GI-Trakt<br/>Dünn- und<br/>Dickdarm</b>                          | <b>0</b> normal                          | <b>1</b> Gering reduzierte Stuhlkonsistenz, geringe Krämpfe; Stuhl $\leq 5$ mal/Tag; geringer Schleim- oder Blutabgang      | <b>2</b> deutlich verminderte Stuhlkonsistenz und Bauchkrämpfe; Stuhl $> 5$ mal/Tag; viel Schleim oder zeitweilig Blutabgang              | <b>3</b> Massiv vermehrte (wäßrige) Stühle, operationsbedürftige Darmobstruktion, (Ileus) oder Blutung                                                                 | <b>4</b> Nekrose; Perforation, Fistel; (sonstige lebensbedrohliche Darmkomplikationen)                                   |
| <b>Leber</b>                                                                | <b>0</b> normal                          | <b>1</b> Geringe Müdigkeit, Übelkeit, Dyspepsie,                                                                            | <b>2</b> Mäßige Symptomatik (Müdigkeit, Übelkeit, Dyspepsie)                                                                              | <b>3</b> Ausgeprägte Leberinsuffizienz                                                                                                                                 | <b>4</b> Lebernekrose, hepatogene(s) Koma oder Enzephalopathie; (parenterale Ernährung, portocavaler Shunt erforderlich) |
| <b>Bilirubin</b>                                                            | <b>0</b> Altersnorm (N)                  | <b>1</b> $> N - 1,5 \times N$                                                                                               | <b>2</b> $> 1,5 - 3,0 \times N$                                                                                                           | <b>3</b> $> 3,0 - 10,0 \times N$                                                                                                                                       | <b>4</b> $> 10,0 \times N$                                                                                               |
| <b>S-GOT / S-GPT</b>                                                        | <b>0</b> Altersnorm (N)                  | <b>1</b> $> N - 2,5 \times N$                                                                                               | <b>2</b> $> 2,5 - 5,0 \times N$                                                                                                           | <b>3</b> $> 5,0 - 20,0 \times N$                                                                                                                                       | <b>4</b> $> 20,0 \times N$                                                                                               |
| <b>Niere</b><br>Kreatinin (mg%)<br>Kreatinin-Clearance<br>Proteinurie (g/l) | <b>0</b> Altersnorm (N)<br><br><br>keine | <b>1</b> $> N - 1,5 \times N$<br>60 - 89<br>< 3                                                                             | <b>2</b> $> 1,5 - 3,0 \times N$<br>40 - 59<br>3 - 10,0                                                                                    | <b>3</b> $> 3,0 - 6,0 \times N$<br>20 - 39<br>10,0                                                                                                                     | <b>4</b> $> 6,0 \times N$<br>< 19<br>Nephrotisches Syndrom                                                               |
| <b>Hämaturie</b>                                                            | <b>0</b> keine                           | <b>1</b> mikroskopisch                                                                                                      | <b>2</b> makroskopisch ohne Koageln                                                                                                       | <b>3</b> makroskopisch mit Koageln                                                                                                                                     | <b>4</b> Transfusion erforderlich                                                                                        |
| <b>Harnleiter und<br/>Blase</b>                                             | <b>0</b> normal                          | <b>1</b> Geringe Schleimhautatrophie; geringe (kleinflächige) Teleangiectasie; (Harndrang gering verstärkt); Mikrohämaturie | <b>2</b> Mäßig verstärkter Harndrang; generalisierte Teleangiectasie; zeitweilig Makrohämaturie; (Polyurie: $> 6$ mal/Tag o. $< 1$ mal/h) | <b>3</b> Massiver Harndrang ( $> 1$ mal/h) und Dysurie; ausgeprägte generalisierte Teleangiectasie (oft mit Petechien); häufig Hämaturie                               | <b>4</b> Nekrose; (Perforation, Fistel) schwere Blasenkontraktur, schwere hämorrhagische Zystitis; (Zystektomie nötig)   |
| <b>Knochen</b>                                                              | <b>0</b> normal                          | <b>1</b> Keine Symptome; keine Wachstumsverzögerung; (gering) reduzierte Knochendichte                                      | <b>2</b> Mäßige Schmerzen oder Spannungsgefühl; (mäßige) Wachstumsstörung; irreguläre Knochen-sklerosierung                               | <b>3</b> Ausgeprägte Schmerzen oder Spannungsgefühl; völliger Wachstumsstillstand; dichte Knochen-sklerosierung                                                        | <b>4</b> Nekrose bzw. Osteoradionekrose; Spontanfraktur                                                                  |
| <b>Gelenke</b>                                                              | <b>0</b> normal                          | <b>1</b> Geringe Gelenksteife; (keine Symptome); geringe Funktionseinbußen                                                  | <b>2</b> Mäßige Gelenksteife; zeitweilige oder mäßige Gelenkschmerzen ; mäßige Funktionseinbußen                                          | <b>3</b> Ausgeprägte Gelenksteife; ausgeprägte Gelenkschmerzen mit ausgeprägten Funktionseinbußen                                                                      | <b>4</b> Nekrose; vollständige Gelenksteife (Ankylose mit Funktionsverlust)                                              |
| <b>Funktion der<br/>bestrahlten<br/>Extremitäten</b>                        | <b>0</b> normal                          | <b>1</b> Diskrete Funktionseinbuße, normale tägliche Aktivitäten möglich.                                                   | <b>2</b> Mäßige Funktionseinbußen bei täglicher Aktivität.                                                                                | <b>3</b> Ausgeprägte Funktionseinbuße.                                                                                                                                 | <b>4</b> Funktionsverlust                                                                                                |
| <b>Gehirn ( ZNS )</b>                                                       | <b>0</b> normal                          | <b>1</b> Geringe Kopfschmerzen, geringe Lethargie (geringe neurologische Ausfälle)                                          | <b>2</b> Mäßige Kopfschmerzen, deutliche Lethargie (Somnolenz $< 50\%$ / Tag); mäßige neurologische Ausfälle                              | <b>3</b> Starke Kopfschmerzen und ausgeprägte ZNS-Störungen, z.B. teilweise Kraftverlust oder Dyskinesie (und Somnolenz $> 50\%$ ); ausgeprägte neurologische Ausfälle | <b>4</b> Krampfanfälle oder Lähmungen, Bewußtlosigkeit (massive oder lebensbedrohliche neurologische Ausfälle)           |
| <b>Rückenmark<br/>(periphere<br/>Nerven)</b>                                | <b>0</b> normal                          | <b>1</b> Diskretes L'hermitte-Zeichen (Parästhesien, reduzierte Reflexe)                                                    | <b>2</b> Ausgeprägtes L'hermitte-Zeichen (mit Parästhesien oder Muskelschwäche)                                                           | <b>3</b> Objektive (segmentale) neurologische Ausfälle (mit Parästhesien oder Paresen)                                                                                 | <b>4</b> Mono-, Para-, Tetraplegie                                                                                       |
| <b>Augen</b>                                                                | <b>0</b> normal                          | <b>1</b> Asymptomatische Linsentrübung; geringe Kornea-Ulzeration oder Keratitis ( und / oder Konjunktivitis)               | <b>2</b> Symptomatische Linsentrübung; mäßige Kornea-ulzeration (Keratitis); mäßige Retinopathie oder Glaukom                             | <b>3</b> Ausgeprägte Keratitis (Ulzeration) ausgeprägte Retinopathie mit Netzhautablösung; ausgeprägtes Glaukom                                                        | <b>4</b> Massive ophthalmologische Störungen; Panophthalmitis; (uni-/ bilateraler Visusverlust                           |
| <b>Ohren</b>                                                                | <b>0</b> normal                          | <b>1</b> Geringe Otitis externa mit Atrophie oder Fibrose; keine Therapie; Audiogramm : Hörverlust $< 10$ dB                | <b>2</b> Mäßige Otitis externa mit Atrophie oder Fibrose; (Tinnitus); lokale Therapie; mäßige Hypakusis (10 - 15 dB)                      | <b>3</b> Ausgeprägte Otitis externa et media; (ständiger Tinnitus nicht medikamentös bedingt); starke Hypakusis ( $> 15 - 20$ dB)                                      | <b>4</b> Schwere Osteochondritis, Ulzeration, Nekrose; vollständige ein-/beidseitige Taubheit ( $> 20$ dB)               |

Anmerkungen:.....

.....

**Wachstum/Pubertät:**

**Körperhöhe in cm:** \_\_\_\_\_ **Sitzhöhe in cm:** \_\_\_\_\_

Körpergewicht in kg: \_\_\_\_\_

Skoliose:  nein  ja

Deformitäten an Knochen und Weichteilen:  nein  ja, Lokalisation:.....

Beschreibung: .....

.....

Pubertätsentwicklung ( nach Schädel-, Becken- oder Oberschenkelbestrahlung; Laborwerte aus der Pädiatrie, bitte Einheit angeben ! ):

**bei Mädchen:** Menarche:  nein  ja

Labor: LH: .....

FSH: .....

Tannerstadium Brust:.....

Östradiol: .....

Tannerstadium Schambehaarung:.....

Prolaktin: .....

**bei Jungen:** Tannerstadium männliche Genitale:.....

Labor: LH: .....

Tannerstadium Schambehaarung:.....

FSH: .....

Hodenvolumen (bei Päd. zu erfragen):.....

Testosteron: .....

Prolaktin: .....

**Schilddrüsenwerte (nach Rad. Kopf/Hals/Mediastinum):**

TSH basal: \_\_\_\_\_ µE / ml (Werte bei Pädiatern zu erfragen)

fT4: \_\_\_\_\_ ng / dl

**Aktuelle Schilddrüsen-Medikation:**

fT3: \_\_\_\_\_ ng/dl

Präparat: \_\_\_\_\_

Datum: \_\_\_\_\_

Dosierung: \_\_\_\_\_

**nach ZNS-Bestrahlung:**

neurokognitiver Test durchgeführt:  nein  ja  
(im Rahmen päd. Nachsorge)

pathologisch:  nein  ja

.....  
Ausfüllender Arzt

.....  
Unterschrift/Klinikstempel
